# Supplementary material for: TRPA1 activation and Hsp90 inhibition synergistically downregulate macrophage activation and inflammatory responses in vitro
Source: Springer Nature journal article supplement (doi:10.1186/s12865-023-00549-0), 2023-06-30
Supplement: MOESM1 [file 25560922]

TRPA1 activation and Hsp90 inhibition synergistically downregulate macrophage activation and inflammatory responses *in vitro*.

**Anukrishna Radhakrishnan<sup>a#</sup>, Tathagata Mukherjee<sup>a#</sup>, Chandan Mahish<sup>a#</sup>, P Sanjai Kumar<sup>b</sup>, Chandan Goswami<sup>a</sup>, Subhasis Chattopadhyay<sup>a†</sup>**

<sup>a</sup> National Institute of Science Education and Research, an OCC of Homi Bhabha National Institute, Bhubaneswar 752050, Odisha, India. anukrishnaradhakrishnan@gmail.com, tathagatam007@gmail.com, chandan1990.13@gmail.com, chandan@niser.ac.in, subho@niser.ac.in<sup>†</sup>

<sup>b</sup> Institute of Life Sciences, Nalco Nagar Rd, NALCO Square, NALCO Nagar, Chandrasekharpur, Bhubaneswar, Odisha 751023, India. sanjai27112009@gmail.com

# Equal contributions

† Corresponding author

## Supplementary information

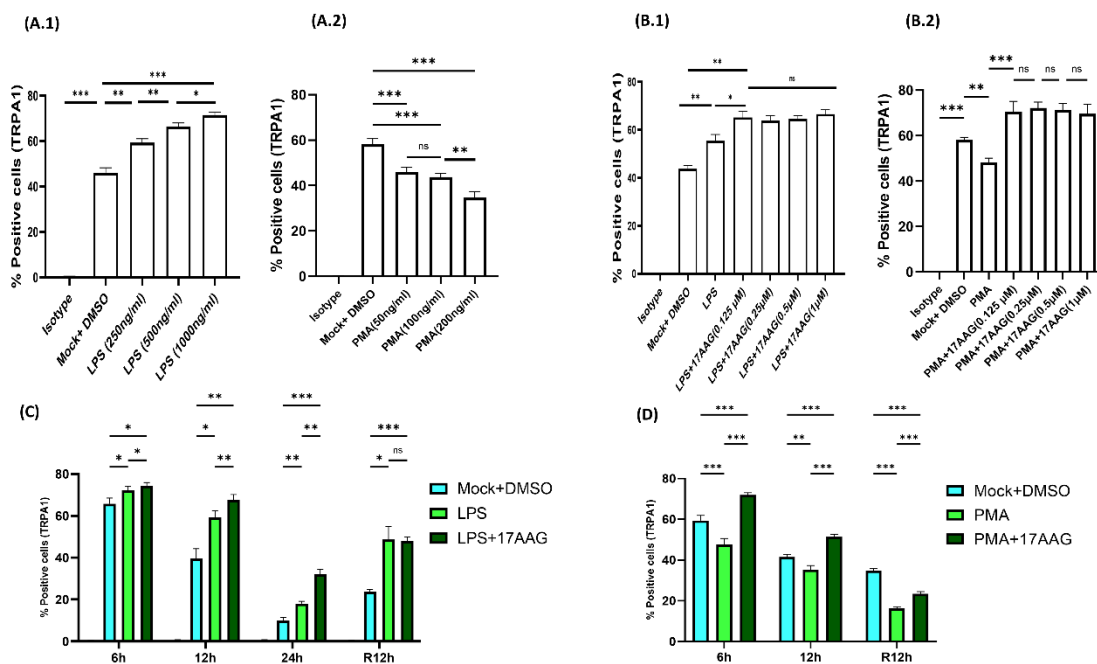

**Supplementary fig.1 Dose and time kinetics of TRPA1 expression in LPS/PMA-stimulated and Hsp90-inhibited macrophages.** RAW 264.7 cells were treated with different doses of LPS, PMA, and 17-AAG for 12 h. (A) Bar graph representing the percentage of positive cells for TRPA1 with different doses of LPS (A.1) / PMA (A.2). (B) Bar graph representing the percentage of positive cells for TRPA1 for differential doses of 17-AAG + LPS (500 ng) (B.1) / PMA (100 ng) (B.2). (C) Bar graph comparing the percentage of positive cells for TRPA1 in the presence of LPS or LPS + 17AAG condition or (D) PMA, PMA + 17-AAG at different time points. R represents time points after the reversal of conditions (replacing the existing culture media with fresh media containing only DMSO). The data represent the mean  $\pm$  SD of three independent experiments. One-way ANOVA was used for A and B, and two-way ANOVA was used for C. Differences between groups with a p-value less than 0.05 were considered statistically significant (ns, non-significant; \*,  $p < 0.05$ ; \*\*,  $p < 0.01$ ; \*\*\*,  $p < 0.001$ ).

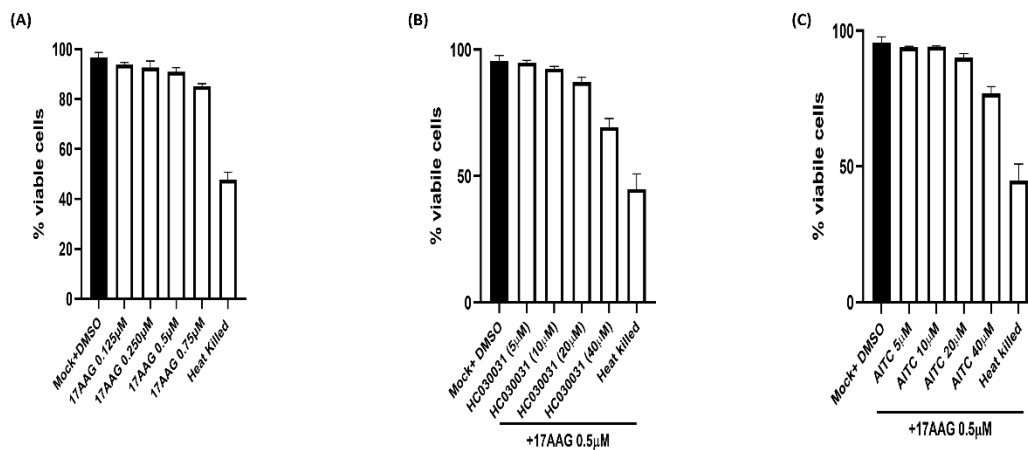

**Supplementary fig.2 Cell viability assay for TRPA1 modulators (AITC and HC-030031) in Hsp90-inhibited macrophages.** RAW 264.7 cells were treated with different doses of 17-AAG or AITC and HC-030031 in the presence of 0.5 µM of 17-AAG. Cells were harvested at 24 h and immediately stained with 7-AAD and analyzed via FC. (A) Bar graph showing the percentage of viable RAW 264.7 cells at different doses of 17-AAG. (B) Bar graph representing the percentage of viable RAW 264.7 cells at different doses of AITC (B) and (C) HC-030031 in Hsp90-inhibited macrophages. The data represent the mean ± SD of three independent experiments. One-way ANOVA has been performed for statistical significance analysis. Differences between groups with a p-value < 0.05 were considered statistically significant (\*\*\*, p < 0.001).

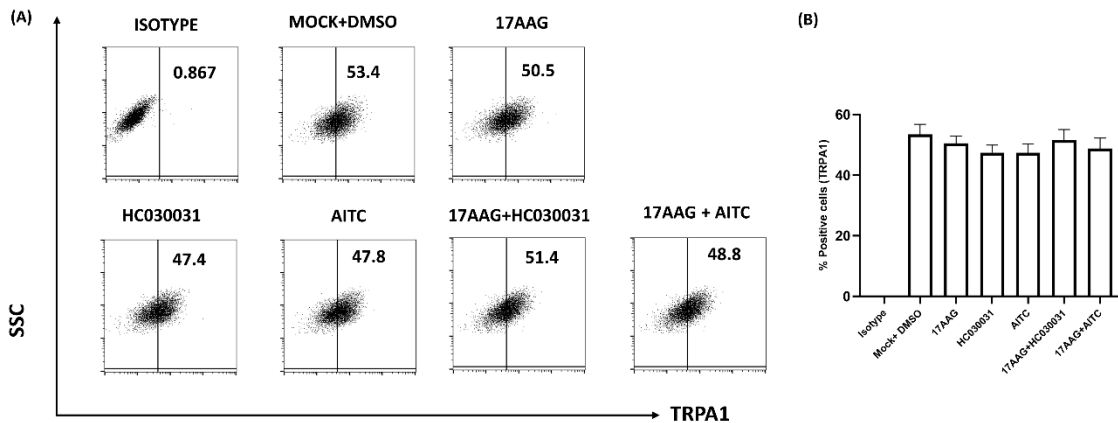

**Supplementary fig.3 Expression levels of TRPA1 in the presence of TRPA1 modulators alone or in combination with 17-AAG in RAW 264.7 cells.** Supplementary fig.3 Expression levels of TRPA1 in the presence of TRPA1 modulators alone or in combination with 17-AAG in RAW 264.7 cells. (A) FC dot-plot depicting the percentage of positive cells for TRPA1 in differential concentrations of AITC and HC-030031 alone or with 17-AAG and (B) representative bar graph showing the same. The data represent the mean ± SD of three independent experiments. One-way ANOVA has been performed to find statistical significance among groups. Differences between groups with a p-value < 0.05 were considered statistically significant.

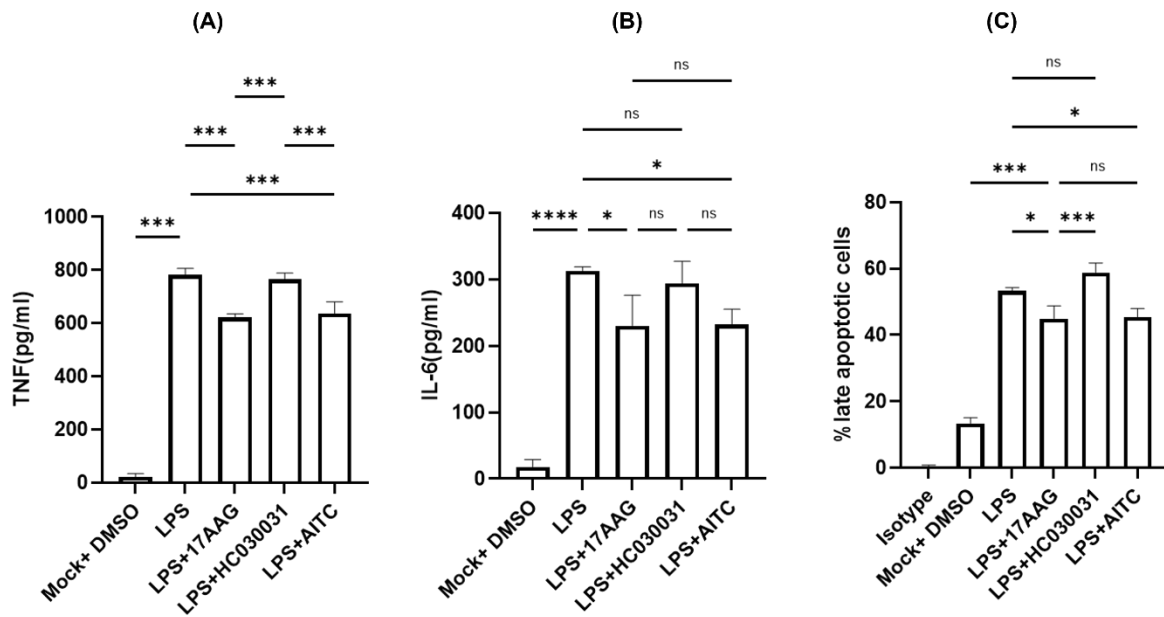

**Supplementary fig.4 Effect of TRPA1 modulators in the absence of Hsp90 inhibitor in regulating LPS-induced inflammation.** Bar graph representing the quantity of TNF (A) and IL-6 (B) production in RAW 264.7 cells under differential conditions of TRPA1 modulator and LPS at 12 h. (C) bar graph representing the % of late apoptotic cells from RAW 264.7 cells under differential conditions of TRPA1 modulator and LPS at 24 h. The data represent the mean  $\pm$  SD of three independent experiments. One-way ANOVA has been performed to find statistical significance among groups. Differences between groups with a p-value less than 0.05 were considered statistically significant (ns, non-significant; \*,  $p < 0.05$ ; \*\*,  $p < 0.01$ ; \*\*\*,  $p < 0.001$ ).

Western blot RAW images:

➤ **Figure 1 of the manuscript:**

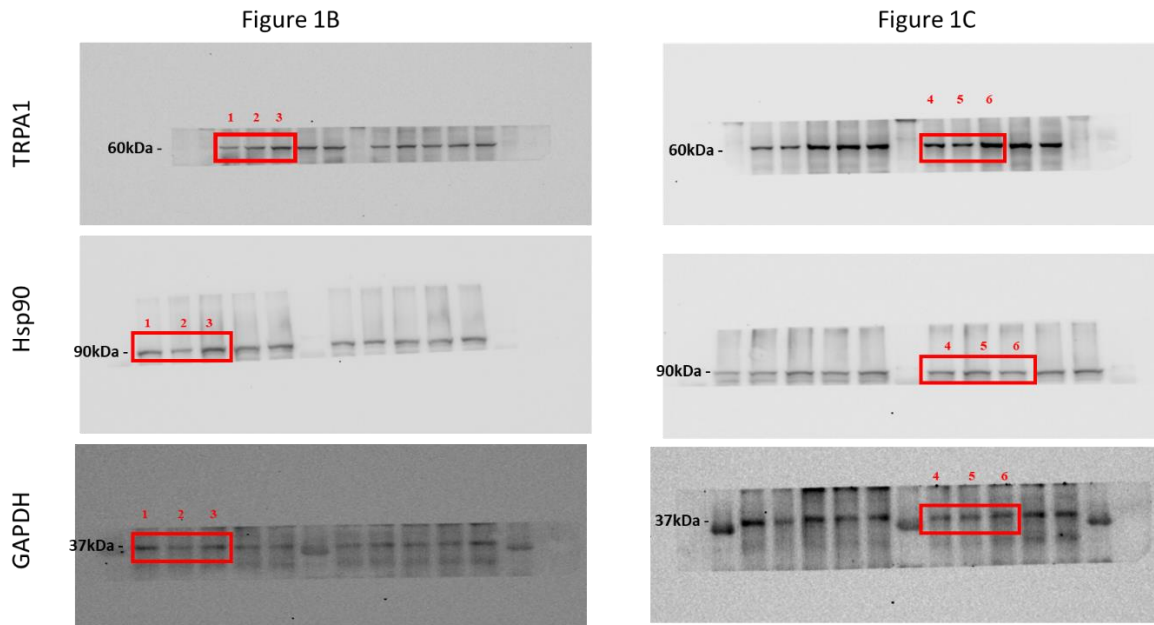

Lanes:

1 – Mock, 2 – LPS, 3 – LPS+ 17-AAG, 4 – Mock, 5 – PMA, 6 – PMA+ 17-AAG

Fig: Raw images for Figures 1 B and 1 C.

➤ **TRPA1 Replicates:**

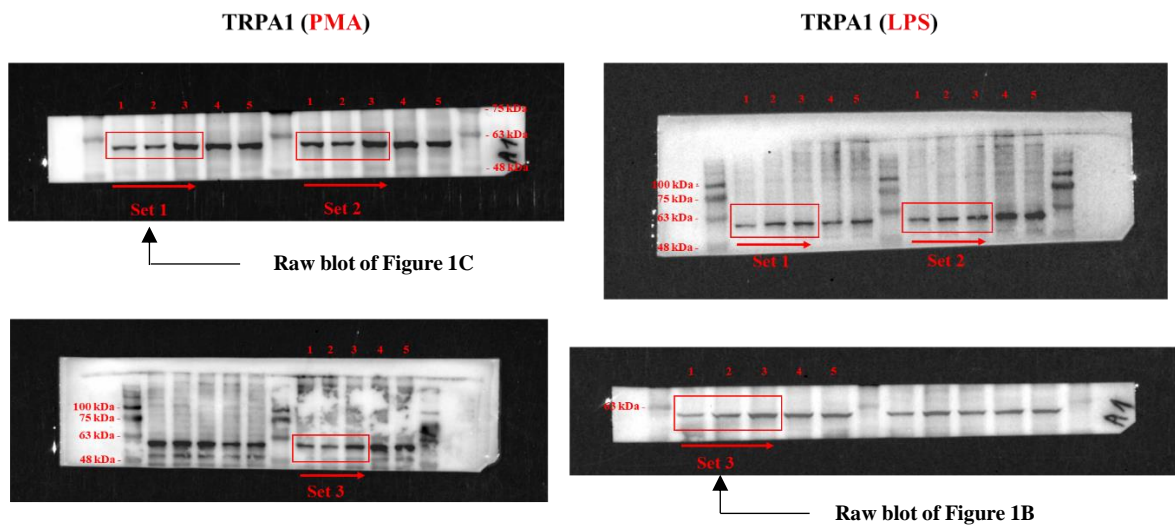

Lanes:

1 – Mock, 2 – LPS/PMA, 3 – LPS/PMA + 17-AAG, 4 – LPS/PMA + 17-AAG + HC, 5 – LPS/PMA + 17-AAG + AITC

Fig: Raw images of TRPA1 replicates.

➤ **Hsp90 Replicates:**

**Hsp90 (PMA)**

**Hsp90 (LPS)**

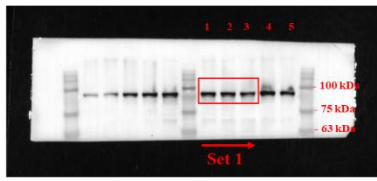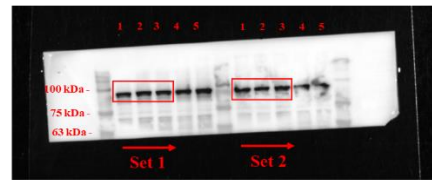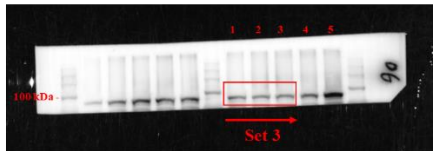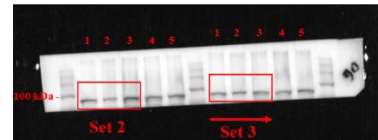

Raw blot of Figure 1C

Raw blot of Figure 1B

Lanes:

1 – Mock, 2 – LPS/PMA, 3 – LPS/PMA + 17-AAG, 4 – LPS/PMA + 17-AAG + HC, 5 – LPS/PMA + 17-AAG + AITC

Fig: Raw images of Hsp90 replicates.

➤ **Figure 6 of the manuscript:**

**Figure 6 D (LPS)**

**Figure 6 E (PMA)**

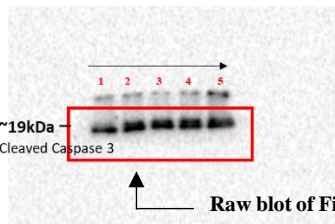

Cleaved Caspase 3

~19kDa-  
Cleaved Caspase 3

Raw blot of Figure 6D

Raw blot of Figure 6E

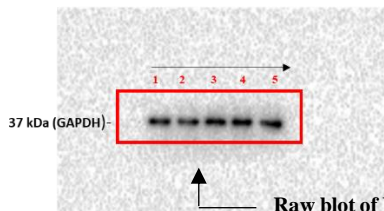

GAPDH

37 kDa (GAPDH)-

Raw blot of Figure 6D

Raw blot of Figure 6E

Lanes:

1 – Mock, 2 – LPS/PMA, 3 – LPS/PMA + 17-AAG, 4 – LPS/PMA + 17-AAG + HC, 5 – LPS/PMA + 17-AAG + AITC

Fig: Raw images of Figures 6 D and 6E.

➤ **Cleaved Caspase 3 Replicates:**

**Cleaved caspase 3 (PMA)**

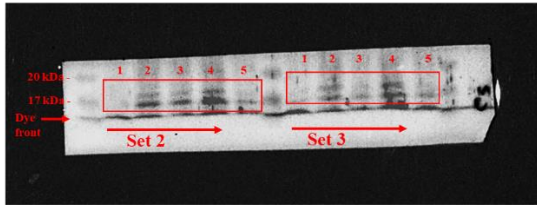

**Cleaved caspase 3 (LPS)**

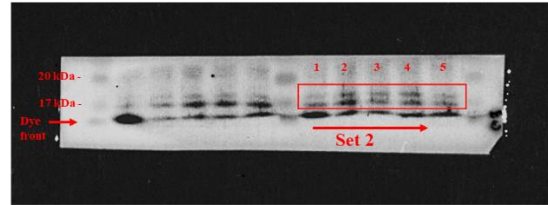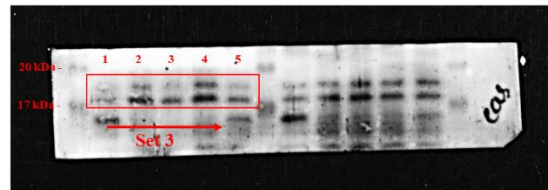

Lanes:

1 – Mock, 2 – LPS/PMA, 3 – LPS/PMA + 17-AAG, 4 – LPS/PMA + 17-AAG + HC, 5 – LPS/PMA + 17-AAG + AITC

Fig: Raw images of cleaved caspase 3 replicates.

➤ **GAPDH Replicates:**

**GAPDH (PMA)**

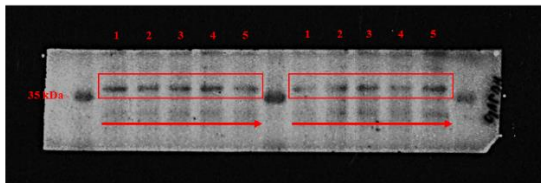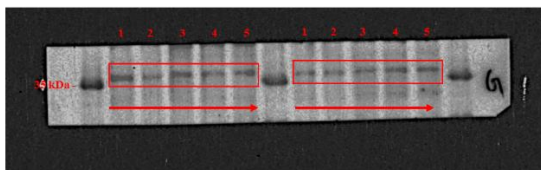

Raw blot of Figure 1C

**GAPDH (LPS)**

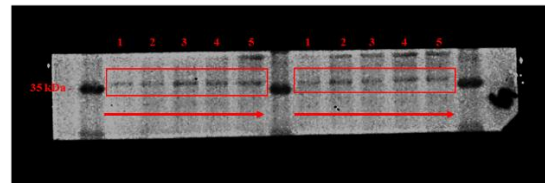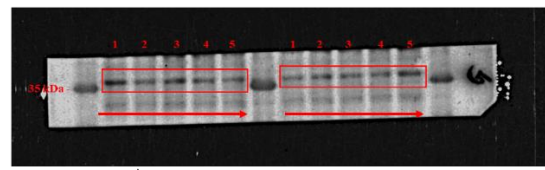

Raw blot of Figure 1B

Lanes:

1 – Mock, 2 – LPS/PMA, 3 – LPS/PMA + 17-AAG, 4 – LPS/PMA + 17-AAG + HC, 5 – LPS/PMA + 17-AAG + AITC

Fig: Raw images of GAPDH replicates.

➤ **Figure 5 of the manuscript:**

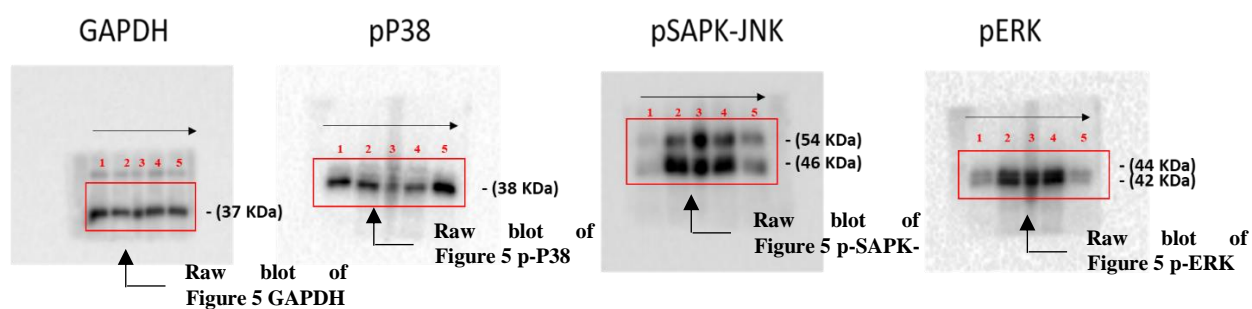

Lanes:

1 – Mock, 2 – LPS/PMA, 3 – LPS + 17-AAG, 4 – LPS + 17-AAG + HC, 5 – LPS + 17-AAG + AITC

Fig: Raw images of p-P38, p-SAPK-JNK and p-ERK.

➤ **p-P38 Replicates:**

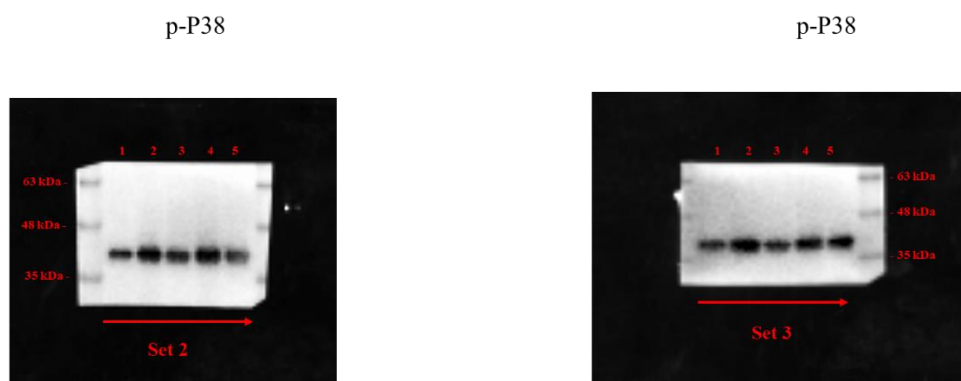

Lanes:

1 – Mock, 2 – LPS, 3 – LPS + 17-AAG, 4 – LPS + 17-AAG + HC, 5 – LPS + 17-AAG + AITC

Fig: Raw images of p-P38 replicates.

➤ **p-SAPK-JNK Replicates:**

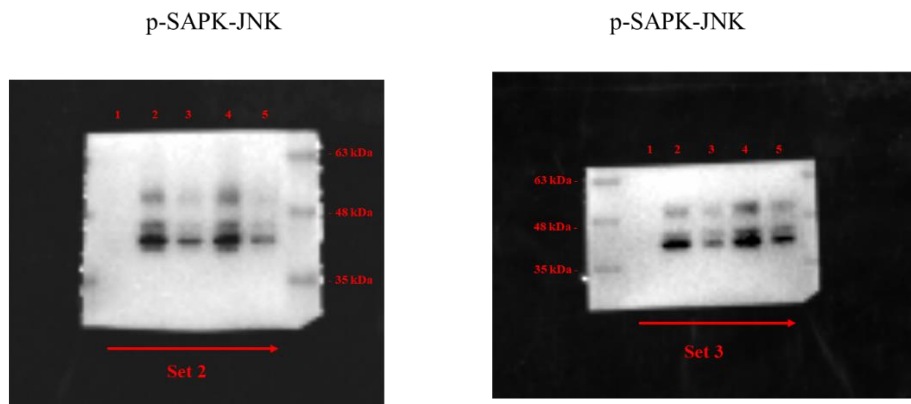

**Lanes:**  
1 – Mock, 2 – LPS, 3 – LPS + 17-AAG, 4 – LPS + 17-AAG + HC, 5 – LPS + 17-AAG + AITC

**Fig: Raw images of p-SAPK-JNK replicates.**

➤ **p-ERK Replicates:**

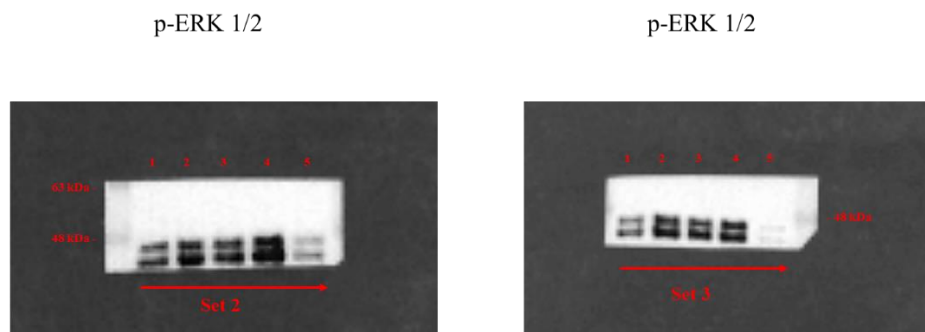

**Lanes:**  
1 – Mock, 2 – LPS, 3 – LPS + 17-AAG, 4 – LPS + 17-AAG + HC, 5 – LPS + 17-AAG + AITC

**Fig: Raw images of p-ERK replicates.**



➤ **GAPDH Replicates:**

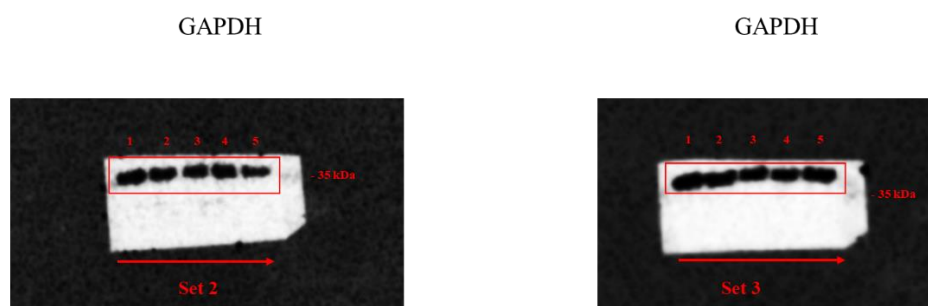

Lanes:

1 – Mock, 2 – LPS, 3 – LPS + 17-AAG, 4 – LPS + 17-AAG + HC, 5 – LPS + 17-AAG + AITC

Fig: Raw images of GAPDH replicates.

➤ **Table S1: Change in Fluo-4 AM intensity in RAW 264.7 cells with time in presence of different experimental treatments.**

| Time(s) | Mock                      | LPS         | Ionomycin   | LPS+17AAG   | LPS+17AAG+HCO<br>30031 | LPS+17AAG+AITC | LPS+HC030031 | LPS+AITC    |
|---------|---------------------------|-------------|-------------|-------------|------------------------|----------------|--------------|-------------|
|         | Mean ± standard deviation |             |             |             |                        |                |              |             |
| 0-20    | 1.00 ± 0.000              | 1.00 ± 0.00 | 1.00 ± 0.00 | 1.00 ± 0.00 | 1.00 ± 0.00            | 1.00 ± 0.00    | 1.00 0.00    | 1.00 0.00   |
| 20-40   | 0.98 ± 0.020              | 2.38 ± 0.58 | 1.41 ± 0.02 | 0.94 ± 0.12 | 0.91 ± 0.12            | 1.09 ± 0.12    | 1.03 0.07    | 1.59 0.15   |
| 40-60   | 0.98 ± 0.052              | 1.73 ± 0.24 | 1.58 ± 0.07 | 0.98 ± 0.07 | 0.90 ± 0.10            | 1.15 ± 0.17    | 1.11 ± 0.12  | 1.59 ± 0.12 |
| 60-80   | 0.94 ± 0.040              | 1.37 ± 0.38 | 1.44 ± 0.04 | 0.95 ± 0.06 | 0.83 ± 0.06            | 1.22 ± 0.07    | 1.09 ± 0.12  | 1.48 ± 0.10 |
| 80-100  | 0.97 ± 0.043              | 1.27 ± 0.37 | 1.38 ± 0.03 | 0.95 ± 0.06 | 0.84 ± 0.07            | 1.26 ± 0.08    | 1.12 ± 0.12  | 1.43 ± 0.19 |
| 100-120 | 0.98 ± 0.020              | 1.25 ± 0.40 | 1.21 ± 0.14 | 0.95 ± 0.03 | 0.82 ± 0.03            | 1.30 ± 0.11    | 1.09 ± 0.13  | 1.32 ± 0.25 |
| 120-140 | 0.97 ± 0.035              | 1.24 ± 0.32 | 1.22 ± 0.21 | 0.96 ± 0.07 | 0.84 ± 0.07            | 1.29 ± 0.10    | 1.12 ± 0.18  | 1.14 ± 0.11 |
| 140-160 | 0.92 ± 0.058              | 1.31 ± 0.25 | 1.21 ± 0.20 | 0.95 ± 0.04 | 0.83 ± 0.05            | 1.29 ± 0.10    | 1.12 ± 0.16  | 1.24 ± 0.01 |
| 160-180 | 0.95 ± 0.025              | 1.14 ± 0.15 | 1.26 ± 0.05 | 0.97 ± 0.02 | 0.90 ± 0.04            | 1.30 ± 0.11    | 1.13 ± 0.21  | 1.35 ± 0.18 |
| 180-200 | 0.95 ± 0.020              | 1.07 ± 0.11 | 1.21 ± 0.02 | 1.00 ± 0.02 | 0.85 ± 0.03            | 1.34 ± 0.10    | 1.10 ± 0.15  | 1.14 ± 0.11 |

Table S1: Fluo-4 AM MFI values obtained from RAW 264.7 cells under each experimental conditions and time interval
